# Supplementary material for: Occupational exposure to respirable crystalline silica and incident idiopathic interstitial pneumonias and pulmonary sarcoidosis: a national prospective follow-up study
Source: HighWire-hosted journal article supplement (doi:10.1136/oemed-2023-108964), 2024-06-01

**Occupational exposure to respirable crystalline silica and incident idiopathic interstitial pneumonias and pulmonary sarcoidosis: a national prospective follow-up study**

Supplementary material

**Contents supplementary material**

Appendix 1: Description of covariates

Table S1: Results of main analysis for idiopathic interstitial pneumonias, pulmonary sarcoidosis and silicosis with age- and sex-adjusted estimates and fully adjusted estimates

Table S2: Analyses in inception population

Table S3: Analyses in population restricted to blue-collar workers at baseline

Table S4: Analyses of idiopathic pulmonary fibrosis

Table S5: Distribution of exposed person-years at risk by ISCO-88 codes

Figure S1: Flowchart of the establishment of the study population

## Appendix 1

We adjusted analyses for age divided into 5-year groups (<50, 50-54, 55-59, 60-64, 65-69, 70-74, 75-79, ≥80 years for all analyses except in the inception population where age groups were redefined (<35, 35-39, 40-44, 45-49, ≥50 years), sex (male, female) and calendar year of follow-up (1977-84, 1985-94, 1995-2004, 2005-15 for the population with begin of follow-up in 1977 and 1994-2004, 2005-2015 for the population with begin of follow-up in 1994).

We adjusted for educational level divided into the following groups: lower secondary, vocational or higher secondary, short-, medium-, and long-cycle higher education and unknown. Information on educational level for each individual was obtained from Statistics Denmark.

Smoking is a risk factor for several ILDs, including IPF (1, 2). As individual information on smoking was not available, we adjusted for estimated probability of smoking for each worker (5-30%, 31-50%, 51-74%) using a smoking job exposure matrix that was developed for the DOC\*X cohort (3). It is based on extensive Danish survey information on probability of tobacco smoking and provides sex- and calendar year-specific estimates of smoking prevalence for all ISCO-88 occupations and has been shown to prospectively predict mortality and acute myocardial infarction independent of other determinants as expected (4, 5). We assigned years without employment the same smoking probability as in the latest previous year with employment. If there was no previous information on smoking probability available due to military or non-valid ISCO-88 codes that could not be linked with the smoking JEM, we assigned the same smoking habit as in the next later period where smoking habit could be assigned.

As CTDs are known risk factors for ILD, we adjusted for previously diagnosed CTD. We identified participants with previously diagnosed CTD in the National Patient Register by ICD-8 codes 446, 712, 716 and 734 and ICD-10 codes M05, M06, M08, M09 and M30-M36.

We adjusted for redeemed prescriptions obtained from the National Prescription Registry which contains information on all prescription drugs sold in Danish pharmacies since 1994 (6). We identified the date of first redemption of one of the following drugs (classified according to the Anatomical Therapeutic Chemical (ATC) classification) which have been associated with increased risk of ILD: Antineoplastic and immunomodulating agents (ATC code L), nitrofurans derivatives (ATC code J01XE), and amiodarone (C01BD01).

The National Prescription Registry does not contain information on drugs dispensed by hospital departments, which is often the case for antineoplastic drugs. As a proxy for exposure to antineoplastic drugs and radiation therapy, which is also a risk factor for ILD, we identified participants with diagnoses of cancer, except non-melanoma skin cancer, in the National Patient Register by ICD-8 codes 140-172 and 174-209; and ICD-10 codes C00-C43 and C45-C96.

## References

1. Lee CT, Feary J, Johansson KA. Environmental and occupational exposures in interstitial lung disease. *Curr Opin Pulm Med*. 2022;28(5):414-20.
2. Bae W, Lee CH, Lee J, Kim YW, Han K, Choi SM. Impact of smoking on the development of idiopathic pulmonary fibrosis: results from a nationwide population-based cohort study. *Thorax*. 2022;77(5):470-6.
3. Bondo Petersen S, Flachs EM, Prescott EIB, Tjonneland A, Osler M, Andersen I, et al. Job-exposure matrices addressing lifestyle to be applied in register-based occupational health studies. *Occupational and environmental medicine*. 2018;75(12):890-7.

4. Flachs EM, Bondo Petersen S, Kolstad HA, Schlünssen V, Svendsen SW, Hansen J, et al. Cohort Profile: DOC\*X: a nationwide Danish occupational cohort with eXposure data - an open research resource. *International journal of epidemiology*. 2019.
5. Bonde JPE, Flachs EM, Madsen IE, Petersen SB, Andersen JH, Hansen J, et al. Acute myocardial infarction in relation to physical activities at work: a nationwide follow-up study based on job-exposure matrices. *Scand J Work Environ Health*. 2020;46(3):268-77.
6. Kildemoes HW, Sørensen HT, Hallas J. The Danish National Prescription Registry. *Scand J Public Health*. 2011;39(7 Suppl):38-41.

**Supplementary table S1.** Incidence rate ratios (IRRs) of idiopathic interstitial pneumonias (IIPs), pulmonary sarcoidosis and silicosis following exposure to respirable crystalline silica as assessed by a job exposure matrix, Denmark

| Exposure                                                                      | IIPs <sup>a</sup>         |                           | Pulmonary sarcoidosis <sup>a</sup> |                           | Silicosis <sup>b</sup>    |                           |
|-------------------------------------------------------------------------------|---------------------------|---------------------------|------------------------------------|---------------------------|---------------------------|---------------------------|
|                                                                               | IRR (95% CI) <sup>c</sup> | IRR (95% CI) <sup>d</sup> | IRR (95% CI) <sup>c</sup>          | IRR (95% CI) <sup>d</sup> | IRR (95% CI) <sup>c</sup> | IRR (95% CI) <sup>d</sup> |
| Cumulative exposure ( $\mu\text{g}/\text{m}^3\text{-years}$ )                 |                           |                           |                                    |                           |                           |                           |
| 0                                                                             | 1                         | 1                         | 1                                  | 1                         | 1                         | 1                         |
| <43.6                                                                         | 1.12 (1.03-1.21)          | 1.04 (0.96-1.13)          | 1.39 (1.25-1.54)                   | 1.30 (1.17-1.44)          | 1.53 (1.05-2.24)          | 1.45 (0.99-2.13)          |
| 43.6-153.1                                                                    | 1.22 (1.13-1.31)          | 1.15 (1.07-1.23)          | 1.59 (1.42-1.78)                   | 1.58 (1.41-1.76)          | 2.54 (1.99-3.24)          | 1.86 (1.45-2.39)          |
| 153.2-1300                                                                    | 1.15 (1.09-1.22)          | 1.14 (1.08-1.21)          | 1.56 (1.40-1.73)                   | 1.61 (1.45-1.78)          | 2.30 (1.83-2.89)          | 2.95 (2.31-3.76)          |
| Per 50 $\mu\text{g}/\text{m}^3\text{-years}$ , incl. non-exposed              | 1.03 (1.02-1.04)          | 1.03 (1.02-1.03)          | 1.06 (1.04-1.07)                   | 1.06 (1.04-1.07)          | 1.14 (1.11-1.16)          | 1.19 (1.16-1.22)          |
| Per 50 $\mu\text{g}/\text{m}^3\text{-years}$ , excl. non-exposed <sup>f</sup> | 1.02 (1.01-1.04)          | 1.03 (1.01-1.04)          | 1.01 (1.00-1.03)                   | 1.03 (1.01-1.05)          | 1.10 (1.06-1.13)          | 1.16 (1.12-1.20)          |
| Highest attained exposure ( $\mu\text{g}/\text{m}^3$ ) <sup>e</sup>           |                           |                           |                                    |                           |                           |                           |
| 0                                                                             | 1                         | 1                         | 1                                  | 1                         | 1                         | 1                         |
| <13.8                                                                         | 1.20 (1.11-1.29)          | 1.11 (1.03-1.20)          | 1.46 (1.33-1.60)                   | 1.34 (1.22-1.47)          | 1.52 (1.03-2.25)          | 2.31 (1.55-3.45)          |
| 13.8-22.4                                                                     | 1.22 (1.11-1.34)          | 1.13 (1.03-1.23)          | 1.62 (1.40-1.87)                   | 1.65 (1.43-1.90)          | 2.62 (1.89-3.63)          | 2.45 (1.76-3.40)          |
| 22.5-105.4                                                                    | 1.13 (1.07-1.19)          | 1.12 (1.06-1.18)          | 1.51 (1.36-1.66)                   | 1.57 (1.42-1.74)          | 2.33 (1.91-2.85)          | 2.34 (1.91-2.86)          |
| Per 5 $\mu\text{g}/\text{m}^3$ , incl. non-exposed                            | 1.03 (1.03-1.04)          | 1.03 (1.02-1.03)          | 1.05 (1.04-1.06)                   | 1.05 (1.04-1.07)          | 1.17 (1.15-1.20)          | 1.18 (1.16-1.20)          |
| Per 5 $\mu\text{g}/\text{m}^3$ , excl. non-exposed <sup>f</sup>               | 1.04 (1.03-1.05)          | 1.04 (1.02-1.05)          | 1.00 (0.98-1.02)                   | 1.02 (1.00-1.04)          | 1.23 (1.19-1.27)          | 1.23 (1.19-1.27)          |
| Duration (years) <sup>e</sup>                                                 |                           |                           |                                    |                           |                           |                           |
| 0                                                                             | 1                         | 1                         | 1                                  | 1                         | 1                         | 1                         |
| 1 – 2                                                                         | 1.13 (1.02-1.24)          | 1.06 (0.96-1.17)          | 1.29 (1.13-1.47)                   | 1.23 (1.08-1.41)          | 2.66 (1.94-3.65)          | 2.24 (1.63-3.07)          |
| 3 – 8                                                                         | 1.22 (1.14-1.30)          | 1.15 (1.08-1.23)          | 1.47 (1.32-1.63)                   | 1.43 (1.29-1.59)          | 2.68 (2.13-3.39)          | 2.29 (1.81-2.90)          |
| 9 – 39                                                                        | 1.14 (1.08-1.20)          | 1.12 (1.06-1.18)          | 1.67 (1.52-1.83)                   | 1.67 (1.52-1.83)          | 1.68 (1.30-2.17)          | 2.54 (1.94-3.34)          |
| Per 5 years, incl. non-exposed                                                | 1.04 (1.02-1.06)          | 1.03 (1.01-1.05)          | 1.18 (1.15-1.21)                   | 1.17 (1.14-1.20)          | 1.19 (1.11-1.28)          | 1.40 (1.29-1.51)          |
| Per 5 years, excl. non-exposed <sup>f</sup>                                   | 0.98 (0.96-1.01)          | 1.00 (0.97-1.03)          | 1.10 (1.06-1.15)                   | 1.10 (1.05-1.14)          | 0.87 (0.77-0.98)          | 1.09 (0.94-1.25)          |

<sup>a</sup>Followed from 1994-2015, 5,100,706 workers<sup>b</sup>Followed from 1977-2015, 5,439,728 workers<sup>c</sup>Adjusted for age and sex<sup>d</sup>Adjusted for age, sex, calendar year, education, probability of smoking, connective tissue disease, cancer and medications<sup>e</sup>For silicosis: all analyses for this metric are not adjusted for education<sup>f</sup>For silicosis: not adjusted for education

**Supplementary table S2.** Incidence rate ratios (IRR) of idiopathic interstitial pneumonias (IIPs), pulmonary sarcoidosis and silicosis following exposure to respirable crystalline silica as assessed by a job exposure matrix among workers born 1956 or later, Denmark

| Exposure                                                         | IIPs <sup>a</sup> |                           | Pulmonary sarcoidosis <sup>a</sup> |                           | Silicosis <sup>b</sup> |                           |
|------------------------------------------------------------------|-------------------|---------------------------|------------------------------------|---------------------------|------------------------|---------------------------|
|                                                                  | Cases             | IRR (95% CI) <sup>c</sup> | Cases                              | IRR (95% CI) <sup>c</sup> | Cases <sup>e</sup>     | IRR (95% CI) <sup>d</sup> |
| Cumulative exposure ( $\mu\text{g}/\text{m}^3\text{-years}$ )    |                   |                           |                                    |                           |                        |                           |
| 0                                                                | 2128              | 1                         | 3353                               | 1                         | 18                     | 1                         |
| <24.6                                                            | 177               | 1.19 (1.02-1.39)          | 312                                | 1.34 (1.19-1.51)          | n.r.                   | 1.57 (0.36-6.93)          |
| 24.6-89.5                                                        | 121               | 1.34 (1.11-1.62)          | 225                                | 1.67 (1.45-1.91)          | n.r.                   | 1.91 (0.55-6.68)          |
| >89.5                                                            | 88                | 1.45 (1.16-1.80)          | 154                                | 1.62 (1.37-1.91)          | n.r.                   | 4.34 (1.84-10.25)         |
| Per 50 $\mu\text{g}/\text{m}^3\text{-years}$ , incl. non-exposed |                   | 1.05 (1.02-1.08)          |                                    | 1.07 (1.05-1.10)          |                        | 1.26 (1.17-1.36)          |
| Highest attained exposure ( $\mu\text{g}/\text{m}^3$ )           |                   |                           |                                    |                           |                        |                           |
| 0                                                                | 2128              | 1                         | 3353                               | 1                         | 18                     | 1                         |
| <9.7                                                             | 230               | 1.30 (1.13-1.49)          | 391                                | 1.42 (1.27-1.58)          | n.r.                   | 1.33 (0.30-5.91)          |
| 9.7-20.0                                                         | 58                | 1.17 (0.89-1.52)          | 129                                | 1.89 (1.58-2.25)          | n.r.                   | 2.97 (1.06-8.33)          |
| >10.0                                                            | 98                | 1.34 (1.09-1.66)          | 171                                | 1.44 (1.23-1.68)          | n.r.                   | 3.91 (1.56-9.78)          |
| Per 5 $\mu\text{g}/\text{m}^3$ , incl. non-exposed               |                   | 1.04 (1.02-1.07)          |                                    | 1.06 (1.04-1.08)          |                        | 1.21 (1.11-1.32)          |
| Duration (years)                                                 |                   |                           |                                    |                           |                        |                           |
| 0                                                                | 2128              | 1                         | 3353                               | 1                         | 18                     | 1                         |
| 1                                                                | 103               | 1.11 (0.91-1.35)          | 186                                | 1.26 (1.08-1.46)          | n.r.                   | 1.50 (0.20-11.34)         |
| 2-5                                                              | 158               | 1.37 (1.16-1.61)          | 271                                | 1.48 (1.30-1.67)          | n.r.                   | 0.65 (0.09-4.97)          |
| 6-39                                                             | 125               | 1.38 (1.14-1.66)          | 234                                | 1.78 (1.55-2.04)          | n.r.                   | 4.62 (2.06-10.34)         |
| Per 5 years, incl. non-exposed                                   |                   | 1.11 (1.05-1.17)          |                                    | 1.20 (1.16-1.25)          |                        | 1.52 (1.23-1.87)          |

n.r.: not reported, cells with less than five cases.

<sup>a</sup>Followed from 1994-2015, 2,955,863 workers<sup>b</sup>Followed from 1977-2015, 2,980,445 workers<sup>c</sup>Adjusted for age, sex, calendar year, education, probability of smoking, connective tissue disease, cancer and medications<sup>d</sup>Adjusted for age, sex, calendar year (1977-94, 1995-2004, 2005-15), probability of smoking, connective tissue disease and medications<sup>e</sup>Total number of silicosis cases: 32

**Supplementary table S3.** Incidence rate ratios (IRR) of idiopathic interstitial pneumonias (IIPs), pulmonary sarcoidosis and silicosis following exposure to respirable crystalline silica as assessed by a job exposure matrix among blue collar workers, Denmark

| Exposure                                                         | IIPs <sup>a</sup> |                           | Pulmonary sarcoidosis <sup>a</sup> |                           | Silicosis <sup>a</sup> |                           |
|------------------------------------------------------------------|-------------------|---------------------------|------------------------------------|---------------------------|------------------------|---------------------------|
|                                                                  | Cases             | IRR (95% CI) <sup>c</sup> | Cases                              | IRR (95% CI) <sup>c</sup> | Cases                  | IRR (95% CI) <sup>d</sup> |
| Cumulative exposure ( $\mu\text{g}/\text{m}^3\text{-years}$ )    |                   |                           |                                    |                           |                        |                           |
| 0                                                                | 3213              | 1                         | 1501                               | 1                         | 256                    | 1                         |
| <43.6                                                            | 329               | 1.06 (0.95-1.19)          | 210                                | 1.14 (0.99-1.32)          | 22                     | 1.40 (0.91-2.17)          |
| 43.6-153.1                                                       | 376               | 1.14 (1.02-1.27)          | 229                                | 1.46 (1.27-1.68)          | 66                     | 2.62 (2.00-3.44)          |
| 153.2-1300                                                       | 1019              | 1.01 (0.94-1.10)          | 358                                | 1.51 (1.33-1.70)          | 86                     | 3.42 (2.65-4.41)          |
| Per 50 $\mu\text{g}/\text{m}^3\text{-years}$ , incl. non-exposed |                   | 1.01 (1.00-1.02)          |                                    | 1.05 (1.03-1.06)          |                        | 1.13 (1.09-1.17)          |
| Per 50 $\mu\text{g}/\text{m}^3\text{-years}$ , excl. non-exposed |                   | 1.02 (1.00-1.03)          |                                    | 1.03 (1.01-1.05)          |                        | 1.08 (1.02-1.15)          |
| Highest attained exposure ( $\mu\text{g}/\text{m}^3$ )           |                   |                           |                                    |                           |                        |                           |
| 0                                                                | 3213              | 1                         | 1501                               | 1                         | 256                    | 1                         |
| <13.8                                                            | 472               | 1.12 (1.01-1.24)          | 286                                | 1.18 (1.04-1.35)          | 18                     | 1.65 (1.02-2.69)          |
| 13.8-22.4                                                        | 242               | 1.03 (0.90-1.18)          | 154                                | 1.68 (1.42-1.99)          | 33                     | 1.73 (1.20-2.48)          |
| 22.5-105.4                                                       | 1010              | 1.02 (0.95-1.10)          | 357                                | 1.45 (1.29-1.64)          | 123                    | 3.34 (2.69-4.15)          |
| Per 5 $\mu\text{g}/\text{m}^3$ , incl. non-exposed               |                   | 1.02 (1.01-1.02)          |                                    | 1.04 (1.03-1.06)          |                        | 1.15 (1.13-1.17)          |
| Per 5 $\mu\text{g}/\text{m}^3$ , excl. non-exposed               |                   | 1.02 (1.00-1.04)          |                                    | 1.01 (0.99-1.04)          |                        | 1.17 (1.12-1.21)          |
| Duration (years)                                                 |                   |                           |                                    |                           |                        |                           |
| 0                                                                | 3213              | 1                         | 1501                               | 1                         | 256                    | 1                         |
| 1 – 2                                                            | 199               | 1.09 (0.94-1.26)          | 129                                | 1.13 (0.95-1.36)          | 39                     | 2.43 (1.73-3.40)          |
| 3 – 8                                                            | 360               | 1.08 (0.97-1.21)          | 228                                | 1.32 (1.14-1.52)          | 76                     | 2.51 (1.94-3.25)          |
| 9 – 39                                                           | 1165              | 1.03 (0.96-1.11)          | 440                                | 1.51 (1.35-1.69)          | 59                     | 2.99 (2.20-4.07)          |
| Per 5 years, incl. non-exposed                                   |                   | 1.00 (0.98-1.03)          |                                    | 1.13 (1.10-1.17)          |                        | 1.40 (1.28-1.53)          |
| Per 5 years, excl. non-exposed                                   |                   | 0.98 (0.95-1.02)          |                                    | 1.08 (1.03-1.14)          |                        | 1.12 (0.96-1.30)          |

<sup>a</sup>Followed from 1994-2015, 1,375,815 workers<sup>b</sup>Followed from 1977-2015, 1,454,098 workers<sup>c</sup>adjusted for age, sex, calendar year, education, probability of smoking, connective tissue disease, cancer and medications<sup>d</sup>Adjusted for age, sex, calendar year, probability of smoking, connective tissue disease, cancer and medications

**Supplementary table S4.** Incidence rate ratios (IRR) of idiopathic pulmonary fibrosis (IPF) following exposure to respirable crystalline silica as assessed by a job exposure matrix among 5,100,706 workers, Denmark 1994-2015

| Exposure                                                                      | IPF   |                           |
|-------------------------------------------------------------------------------|-------|---------------------------|
|                                                                               | Cases | IRR (95% CI) <sup>a</sup> |
| Cumulative exposure ( $\mu\text{g}/\text{m}^3\text{-years}$ )                 |       |                           |
| 0                                                                             | 321   | 1                         |
| <43.6                                                                         | 13    | 0.91 (0.52-1.59)          |
| 43.6-153.1                                                                    | 20    | 1.35 (0.85-2.15)          |
| 153.2-1300                                                                    | 37    | 1.00 (0.70-1.44)          |
| Per 50 $\mu\text{g}/\text{m}^3\text{-years}$ , incl. non-exposed              |       | 1.01 (0.97-1.06)          |
| Per 50 $\mu\text{g}/\text{m}^3\text{-years}$ , excl. non-exposed <sup>b</sup> |       | 1.03 (0.96-1.10)          |
| Highest attained exposure ( $\mu\text{g}/\text{m}^3$ )                        |       |                           |
| 0                                                                             | 321   | 1                         |
| <13.8                                                                         | 21    | 1.19 (0.76-1.88)          |
| 13.8-22.4                                                                     | 12    | 1.23 (0.68-2.22)          |
| 22.5-105.4                                                                    | 37    | 0.95 (0.66-1.36)          |
| Per 5 $\mu\text{g}/\text{m}^3$ , incl. non-exposed                            |       | 1.00 (0.96-1.05)          |
| Per 5 $\mu\text{g}/\text{m}^3$ , excl. non-exposed <sup>b</sup>               |       | 0.99 (0.91-1.07)          |
| Duration (years)                                                              |       |                           |
| 0                                                                             | 321   | 1                         |
| 1 – 2                                                                         | 8     | 0.92 (0.45-1.86)          |
| 3 – 8                                                                         | 19    | 1.15 (0.72-1.85)          |
| 9 – 39                                                                        | 43    | 1.05 (0.75-1.48)          |
| Per 5 years, incl. non-exposed                                                |       | 1.02 (0.92-1.13)          |
| Per 5 years, excl. non-exposed <sup>b</sup>                                   |       | 1.06 (0.89-1.27)          |

<sup>a</sup>Adjusted for age, sex, calendar year, education, probability of smoking, connective tissue disease, cancer and medications

<sup>b</sup>Not adjusted for education



**Table S5.** Distribution of exposed person-years at risk by ISCO-88 codes in the total study population.

| ISCO-88      | Description                                                                   | Person-years     | Percent       |
|--------------|-------------------------------------------------------------------------------|------------------|---------------|
| 2452         | Sculptors, painters and related artists                                       | 48,895           | 0.90          |
| 6110         | Market gardeners and crop growers                                             | 324              | 0.01          |
| 6111         | Field crop and vegetable growers                                              | 82,577           | 1.53          |
| 6112         | Tree and shrub crop growers                                                   | 213,010          | 3.93          |
| 6113         | Gardeners, horticultural and nursery growers                                  | 34,610           | 0.64          |
| 6130         | Market-oriented crop and animal producers                                     | 231,362          | 4.27          |
| 7100         | Extraction and building trades workers                                        | 62,219           | 1.15          |
| 7110         | Miners, shotfirers, stone cutters and carvers                                 | 215              | 0.00          |
| 7111         | Miners and quarry workers                                                     | 861              | 0.02          |
| 7112         | Shotfirers and blasters                                                       | 313              | 0.01          |
| 7113         | Stone splitters, cutters and carvers                                          | 9,061            | 0.17          |
| 7120         | Building frame and related trades workers                                     | 654,767          | 12.09         |
| 7121         | Builders, traditional materials                                               | 13,933           | 0.26          |
| 7122         | Bricklayers and stonemasons                                                   | 442,314          | 8.17          |
| 7123         | Concrete placers, concrete finishers and related workers                      | 6,975            | 0.13          |
| 7129         | Building frame and related trades workers not elsewhere classified            | 61,477           | 1.14          |
| 7131         | Roofers                                                                       | 28,441           | 0.53          |
| 7132         | Floor layers and tile setters                                                 | 26,692           | 0.49          |
| 7133         | Plasterers                                                                    | 5,510            | 0.10          |
| 7143         | Building structure cleaners                                                   | 31,624           | 0.58          |
| 7211         | Metal moulders and coremakers                                                 | 24,236           | 0.45          |
| 7321         | Abrasive wheel formers, potters and related workers                           | 14,530           | 0.27          |
| 8110         | Mining- and mineral-processing plant operators                                | 21               | 0.00          |
| 8111         | Mining-plant operators                                                        | 117              | 0.00          |
| 8112         | Mineral-ore- and stone-processing-plant operators                             | 9,835            | 0.18          |
| 8113         | Well drillers and borers and related workers                                  | 13,032           | 0.24          |
| 8130         | Glass, ceramics and related plant operators                                   | 3,035            | 0.06          |
| 8131         | Glass and ceramics kiln and related machine operators                         | 56,651           | 1.05          |
| 8139         | Glass, ceramics and related plant operators not elsewhere classified          | 13,409           | 0.25          |
| 8210         | Metal- and mineral-products machine operators                                 | 65               | 0.00          |
| 8212         | Cement and other mineral products machine operators                           | 47,480           | 0.88          |
| 8223         | Metal finishing-, plating- and coating-machine operators                      | 48,335           | 0.89          |
| 8330         | Agricultural and other mobile-plant operators                                 | 7,264            | 0.13          |
| 8331         | Motorised farm and forestry plant operators                                   | 42,992           | 0.79          |
| 8332         | Earth-moving- and related plant operators                                     | 101,738          | 1.88          |
| 9160         | Garbage collectors and related labourers                                      | 58,473           | 1.08          |
| 9161         | Garbage collectors                                                            | 28,266           | 0.52          |
| 9162         | Sweepers and related labourers                                                | 27,572           | 0.51          |
| 9211         | Farm-hands and labourers                                                      | 1,457,115        | 26.91         |
| 9300         | Labourers in mining, construction, manufacturing and transport                | 42,620           | 0.79          |
| 9310         | Mining and construction labourers                                             | 149,577          | 2.76          |
| 9311         | Mining and quarrying labourers                                                | 2,695            | 0.05          |
| 9312         | Construction and maintenance labourers: roads, dams and similar constructions | 617,009          | 11.40         |
| 9313         | Building construction labourers                                               | 693,234          | 12.80         |
| <b>Total</b> |                                                                               | <b>5,414,481</b> | <b>100.00</b> |

**Supplementary figure S1.** Establishment of the study population.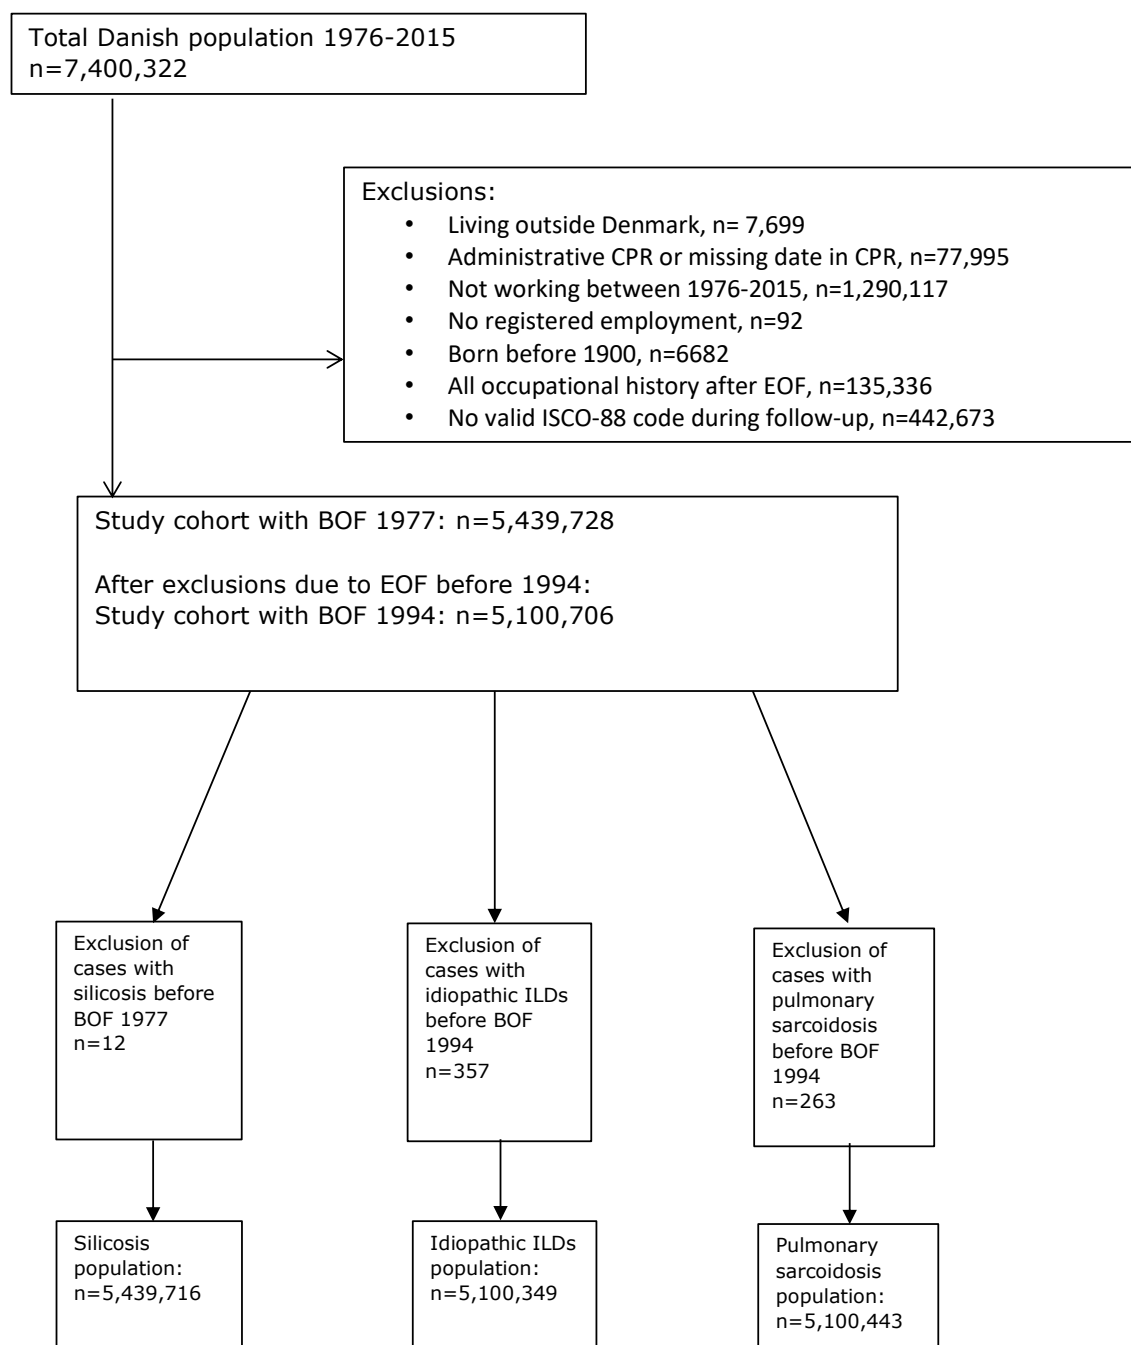

Supplement: oemed-2023-108964supp001_data_supplement.pdf [file oemed-2023-108964supp001_data_supplement.pdf]
